# Supplementary material for: Characterization and antimicrobial activity of a chitosan-selenium nanocomposite biosynthesized using Posidonia oceanica
Source: Royal Society of Chemistry journal article supplement (doi:10.1039/d3ra04288j), 2023-01-01
Supplement: d3ra04288j1.pdf [file d3ra04288j1.pdf]

## Characterization and antimicrobial activity of chitosan-selenium nanocomposite biosynthesized using *Posidonia oceanica*

### Supplementary materials

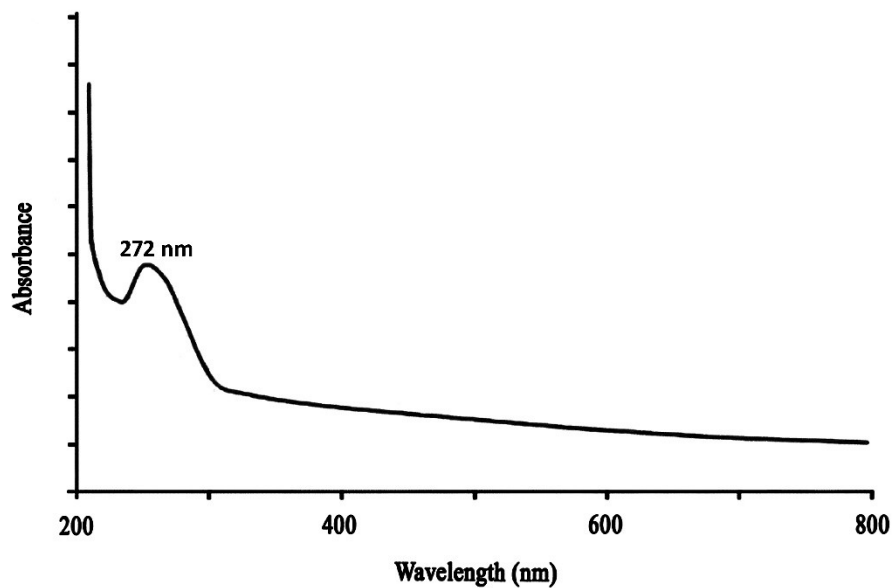

Fig 1-S. The UV-vis spectra of synthesized SeNPs using *Posidonia oceanica* extract

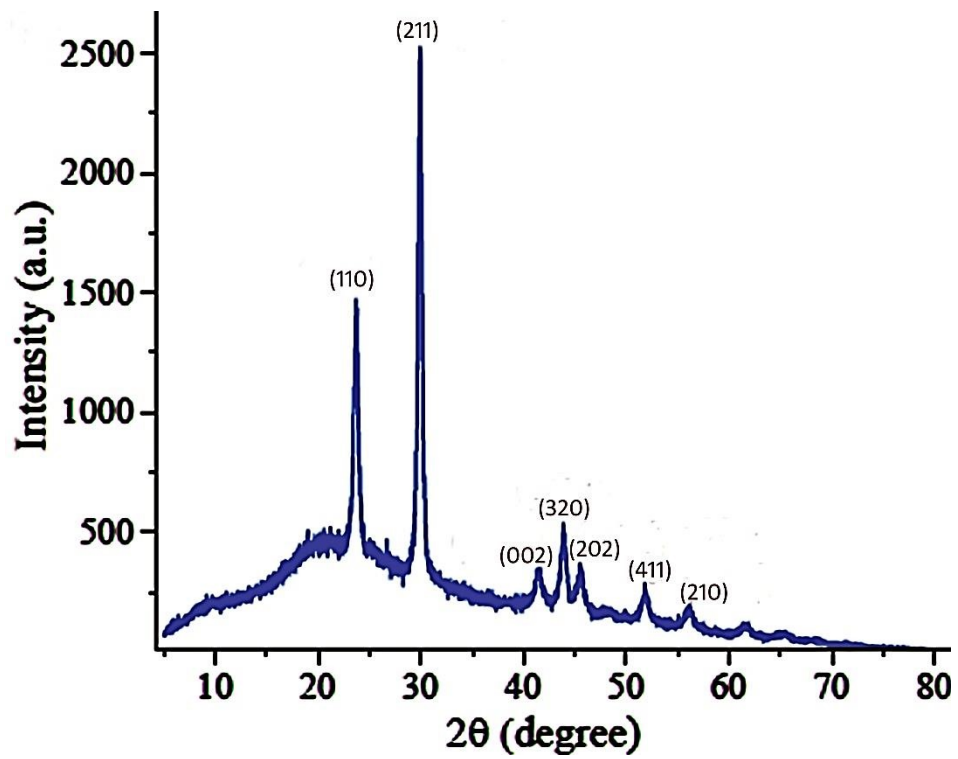

Fig 2-S. The XRD spectrum of synthesized SeNPs using *Posidonia oceanica* extract

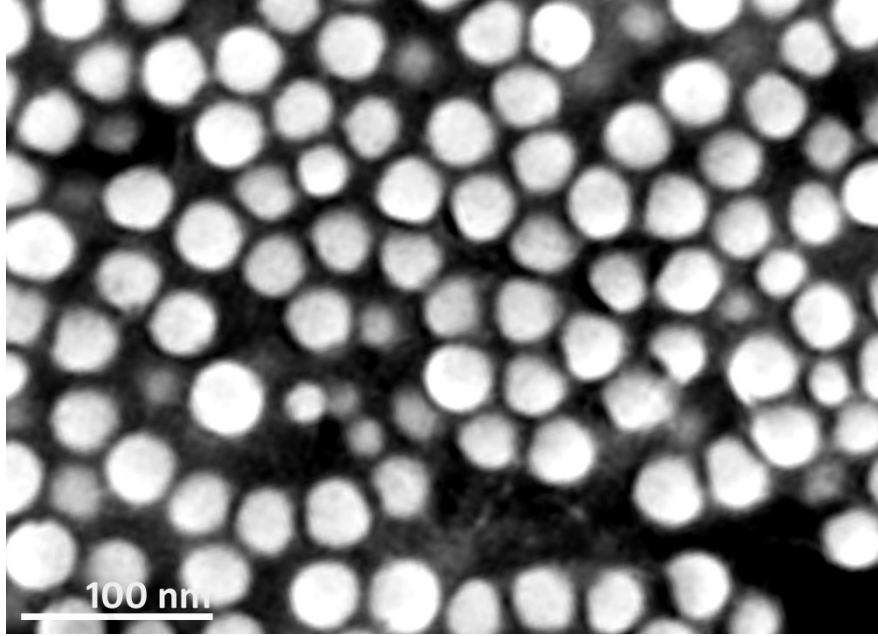

**Fig 3-S.** The SEM imaging of plain synthesized SeNPs using *Posidonia oceanica* extract

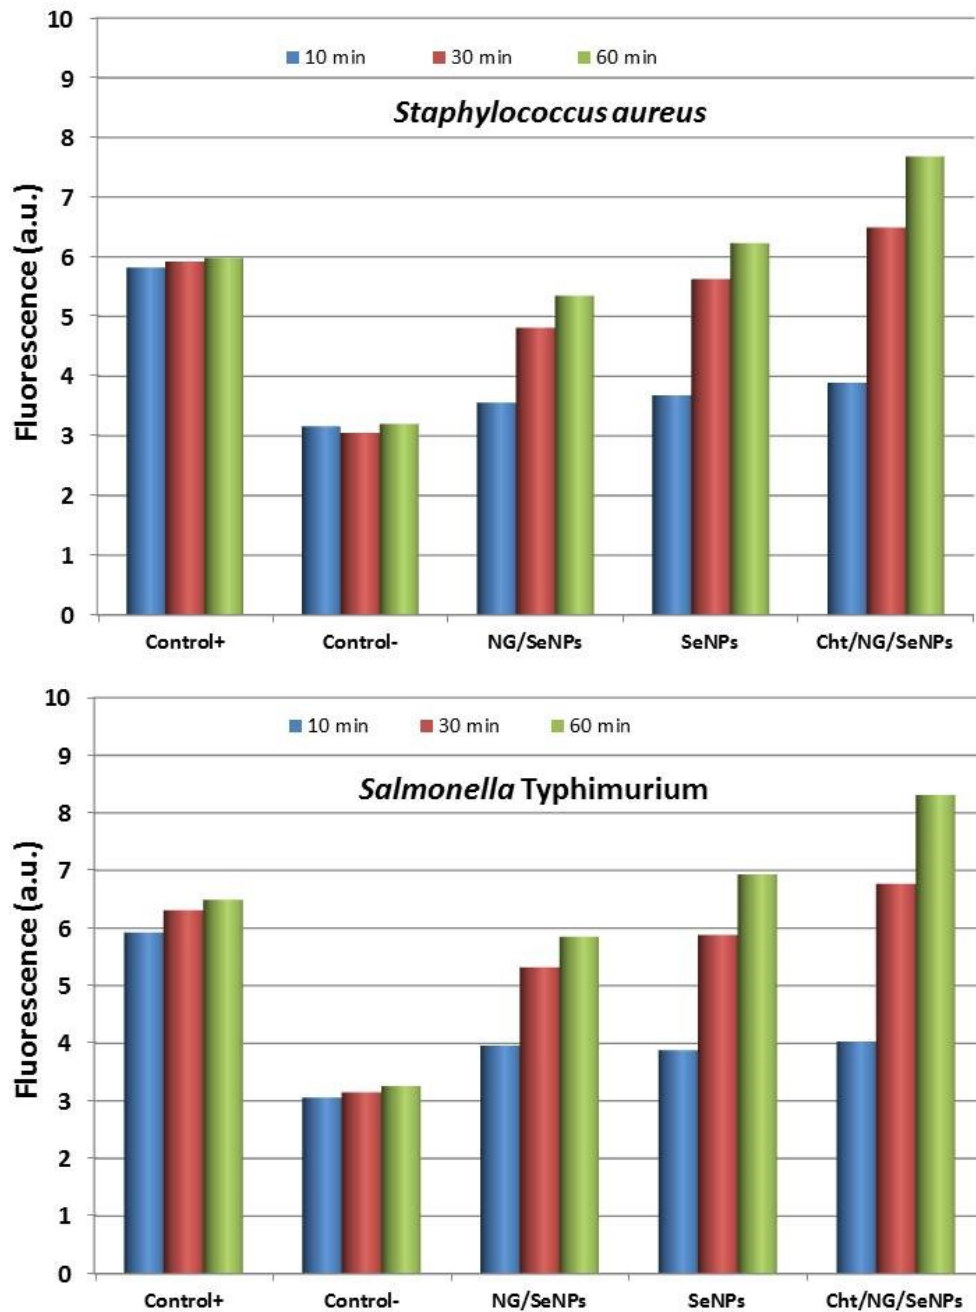

**Fig 4-S.** The ROS generation from nanomaterials (plain SeNPs, *Posidonia oceanica* extract synthesized SeNPs and their mixture with nanochitosan) compared to control<sup>+</sup> (ROS-UP of the kit) and control<sup>-</sup> (2% DMSO solution), after 10, 30 and 60 min of incubation
